# Supplementary material
Source: PubMed Central journal article supplement (PMC6646220)

## **Novel $^{18}\text{F}$ -labeled PET imaging agent FV45 targeting the renin-angiotensin system**

Xinyu Chen<sup>a,b</sup>, Mitsuru Hirano<sup>c</sup>, Rudolf A Werner<sup>a,b,d</sup>, Michael Decker<sup>e\*</sup>, Takahiro Higuchi<sup>a,b,c\*</sup>

<sup>a</sup>Department of Nuclear Medicine, University Hospital of Würzburg, Würzburg, Germany

<sup>b</sup>Comprehensive Heart Failure Center, University Hospital of Würzburg, Würzburg, Germany

<sup>c</sup>Department of Bio-Medical Imaging, National Cerebral and Cardiovascular Center, Osaka, Japan

<sup>d</sup>The Russell H. Morgan Department of Radiology and Radiological Science, Division of Nuclear Medicine and Molecular Imaging, Johns Hopkins University School of Medicine, Baltimore, MD, United States

<sup>e</sup>Institute of Pharmacy and Food Chemistry, University of Würzburg, Würzburg, Germany

## Supporting information

Figure S1. HPLC purity of precursor.

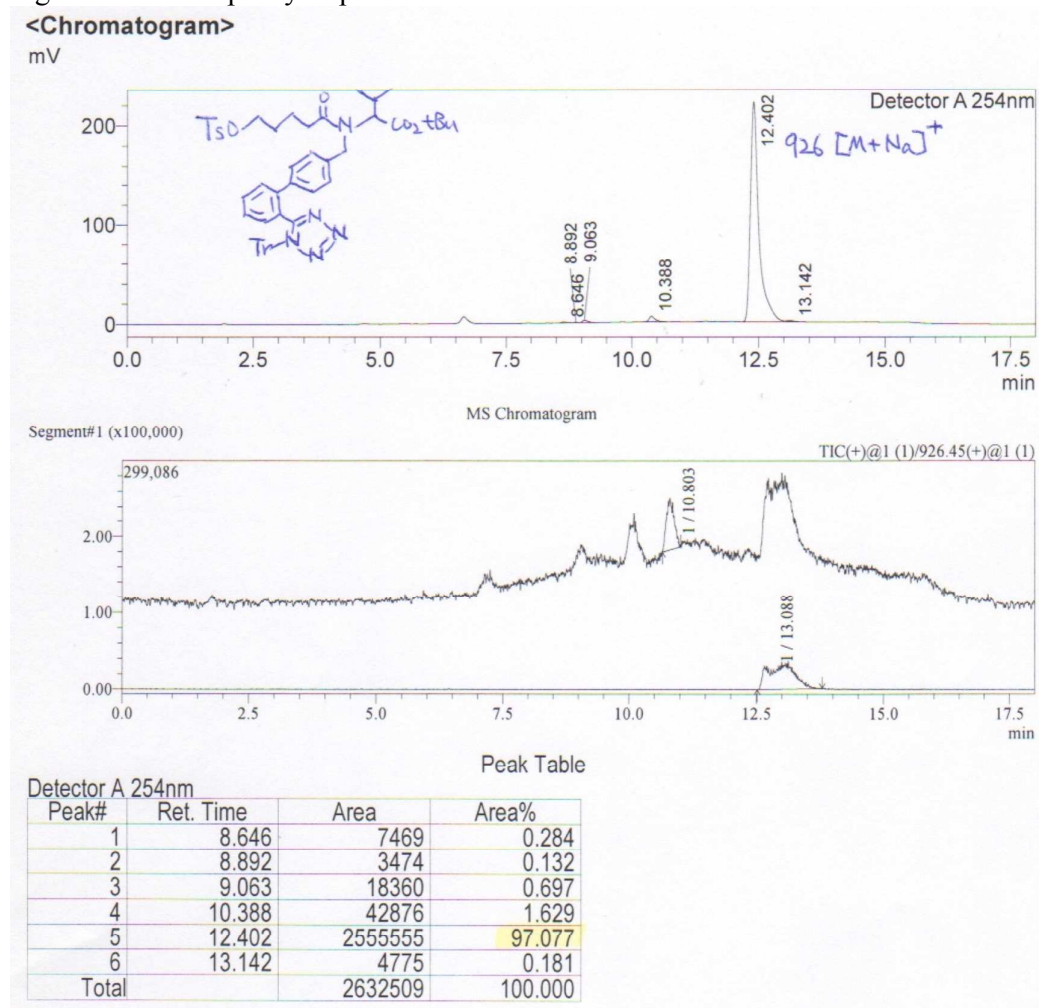

Figure S2. Gamma detector signal of HPLC after radiolabeling. In addition to the free fluoride-18 at RT 4 min, there are two peaks after radiolabeling: 18F-FV45 and its corresponding *tert*-butyl ester, which was not totally removed after 10 min of heating with HCl at 110°C.

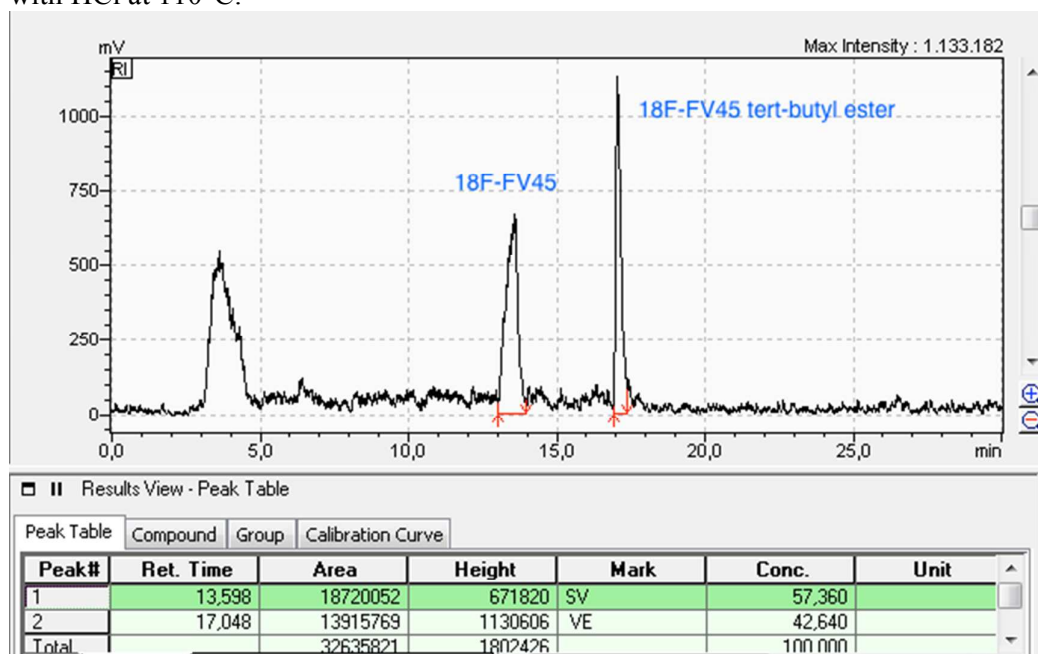

Figure S3. Gamma detector signal of HPLC after improved radiolabeling procedure. After the addition of HCl, the heating time was prolonged from 10 to 20 min. All *tert*-butyl ester could be hydrolyzed and high radioactive purity of target tracer could be obtained after HPLC purification in order to remove the un-reacted free fluoride-18 and hydrolyzed precursor.

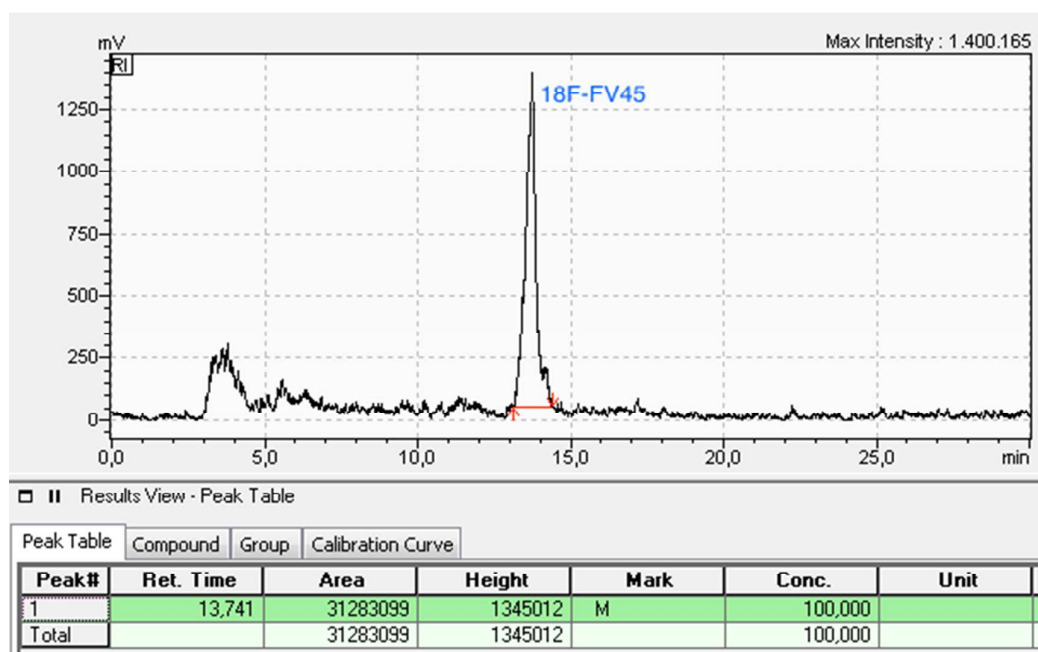

Supplement: ao8b01885_si_002.pdf [file ao8b01885_si_002.pdf]
